# Supplementary material for: One-pot synthesis of fused benzoxazino[1,2,3]triazolyl[4,5-c]quinolinone derivatives and their anticancer activity
Source: Royal Society of Chemistry journal article supplement (doi:10.1039/c6ra12285j), 2016-01-01

**One-pot synthesis of fused benzoxazino[1,2,3]triazolyl[4,5-*c*]quinolinone derivatives and their anticancer activity**

Sirassu Narsimha,<sup>a</sup> Kumara Swamy Battula,<sup>a</sup> Satheesh Kumar Nukala,<sup>a</sup> Ramesh Gondru,<sup>b</sup> Yellu Narasimha Reddy,<sup>c</sup> Vasudeva Reedy Nagavelli<sup>a\*</sup>

<sup>a</sup> *Department of Chemistry, Kakatiya University, Warangal, TS 506 009, India*

<sup>b</sup> *Department of Chemistry, National Institute of Technology, Warangal-506 004, Telangana State, India.*

<sup>c</sup> *Department of Pharmacology and Toxicology, Kakatiya University, Warangal, TS 506 009, India*

**Contents**

- <sup>1</sup>H NMR and <sup>13</sup>C NMR Spectra of the synthesized compounds **4a–4k**.

**5-iodo-4-(prop-2-yn-1-yl)-2H-benzo[b][1,4]oxazin-3(4H)-one (3)**

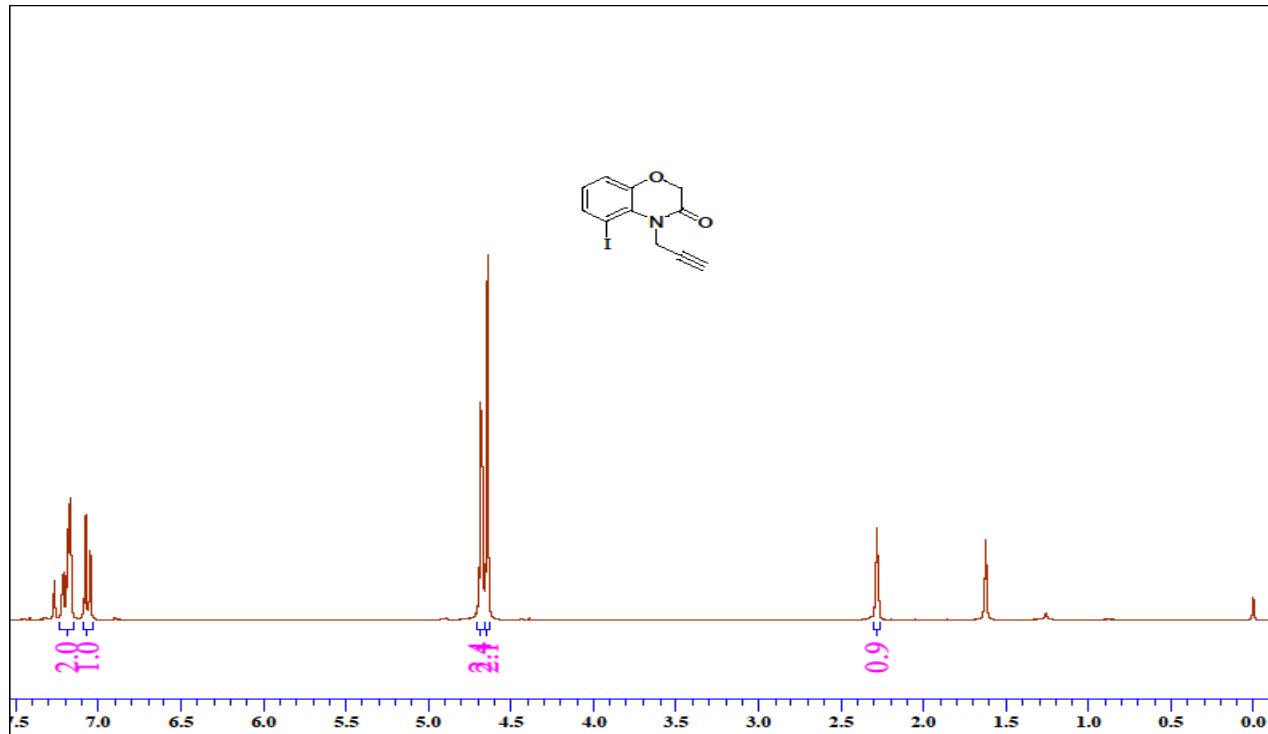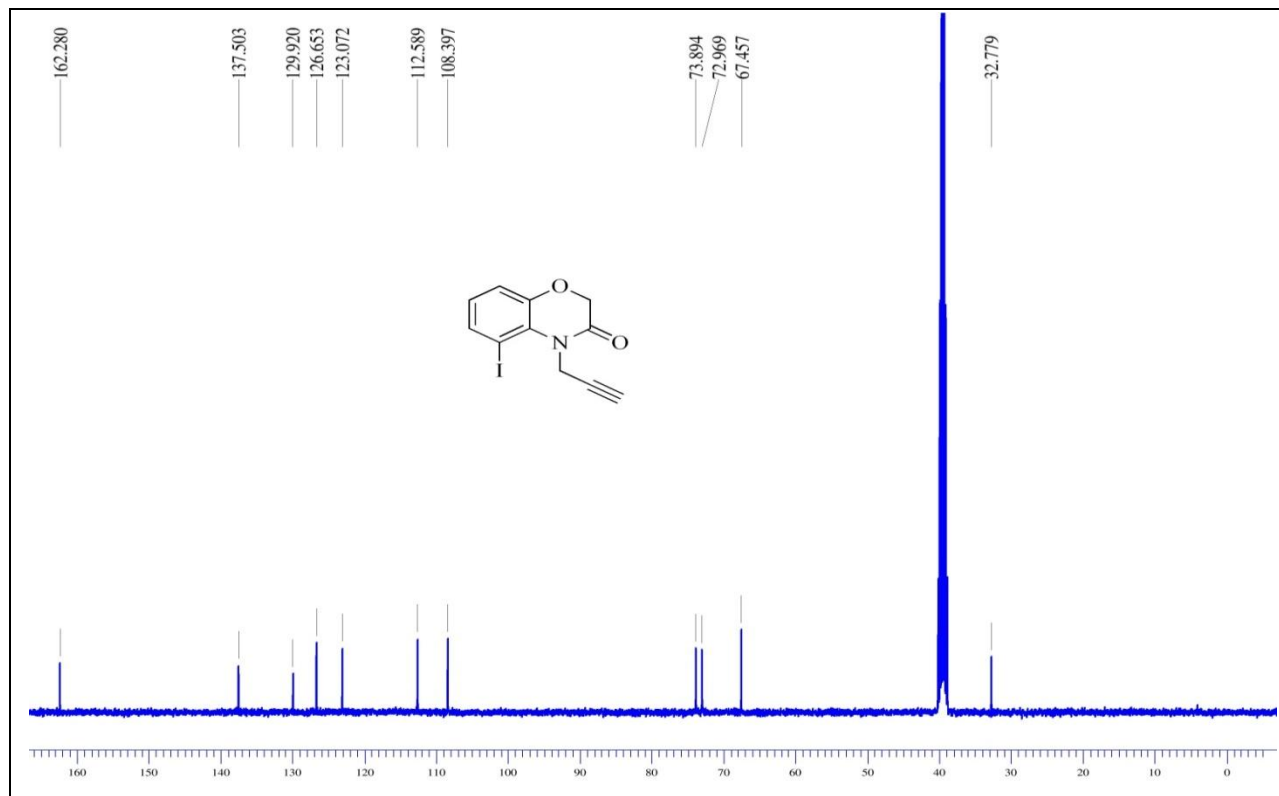

**11-(4-methoxyphenyl)-8,11-dihydro-[1,4]oxazino[2,3,4-ij][1,2,3]triazolo[4,5-c]quinolin-6(5H)-one (4a)**

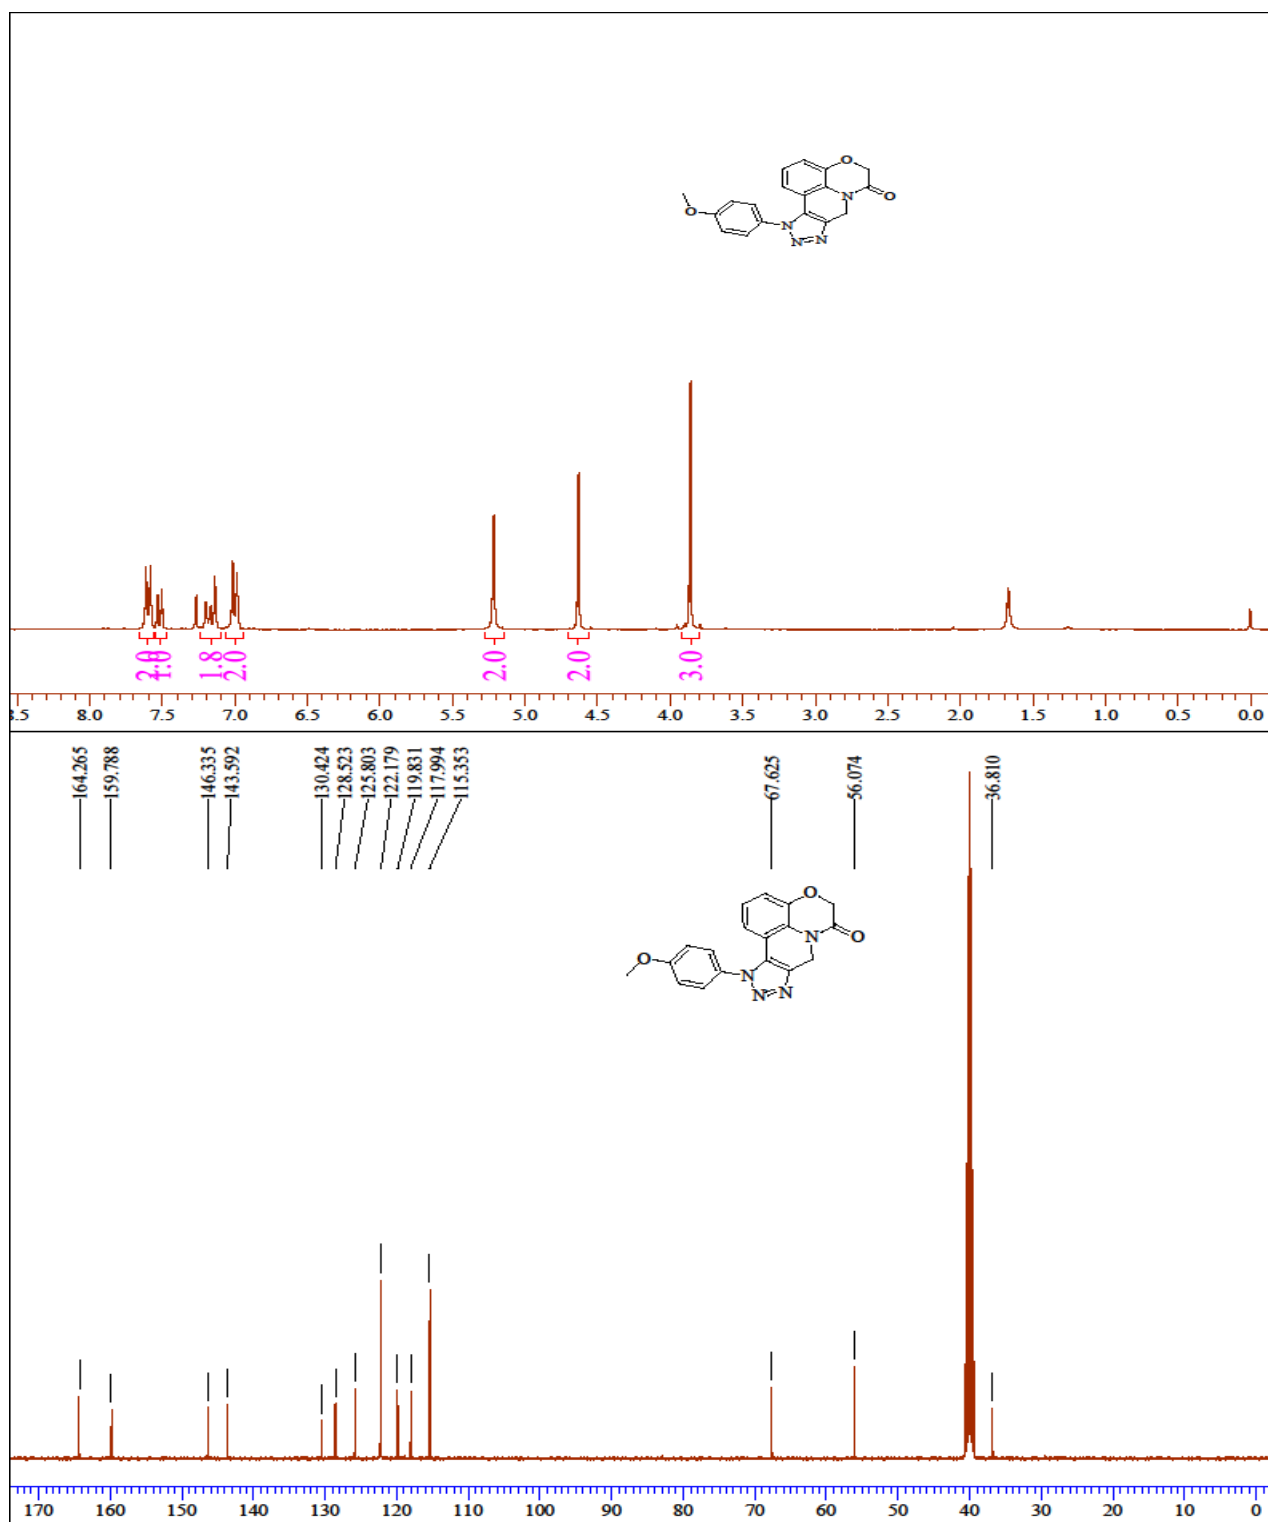

**11-(3,5-dimethylphenyl)-8,11-dihydro-[1,4]oxazino[2,3,4-ij][1,2,3]triazolo[4,5-c]quinolin-6(5H)-one(4b)**

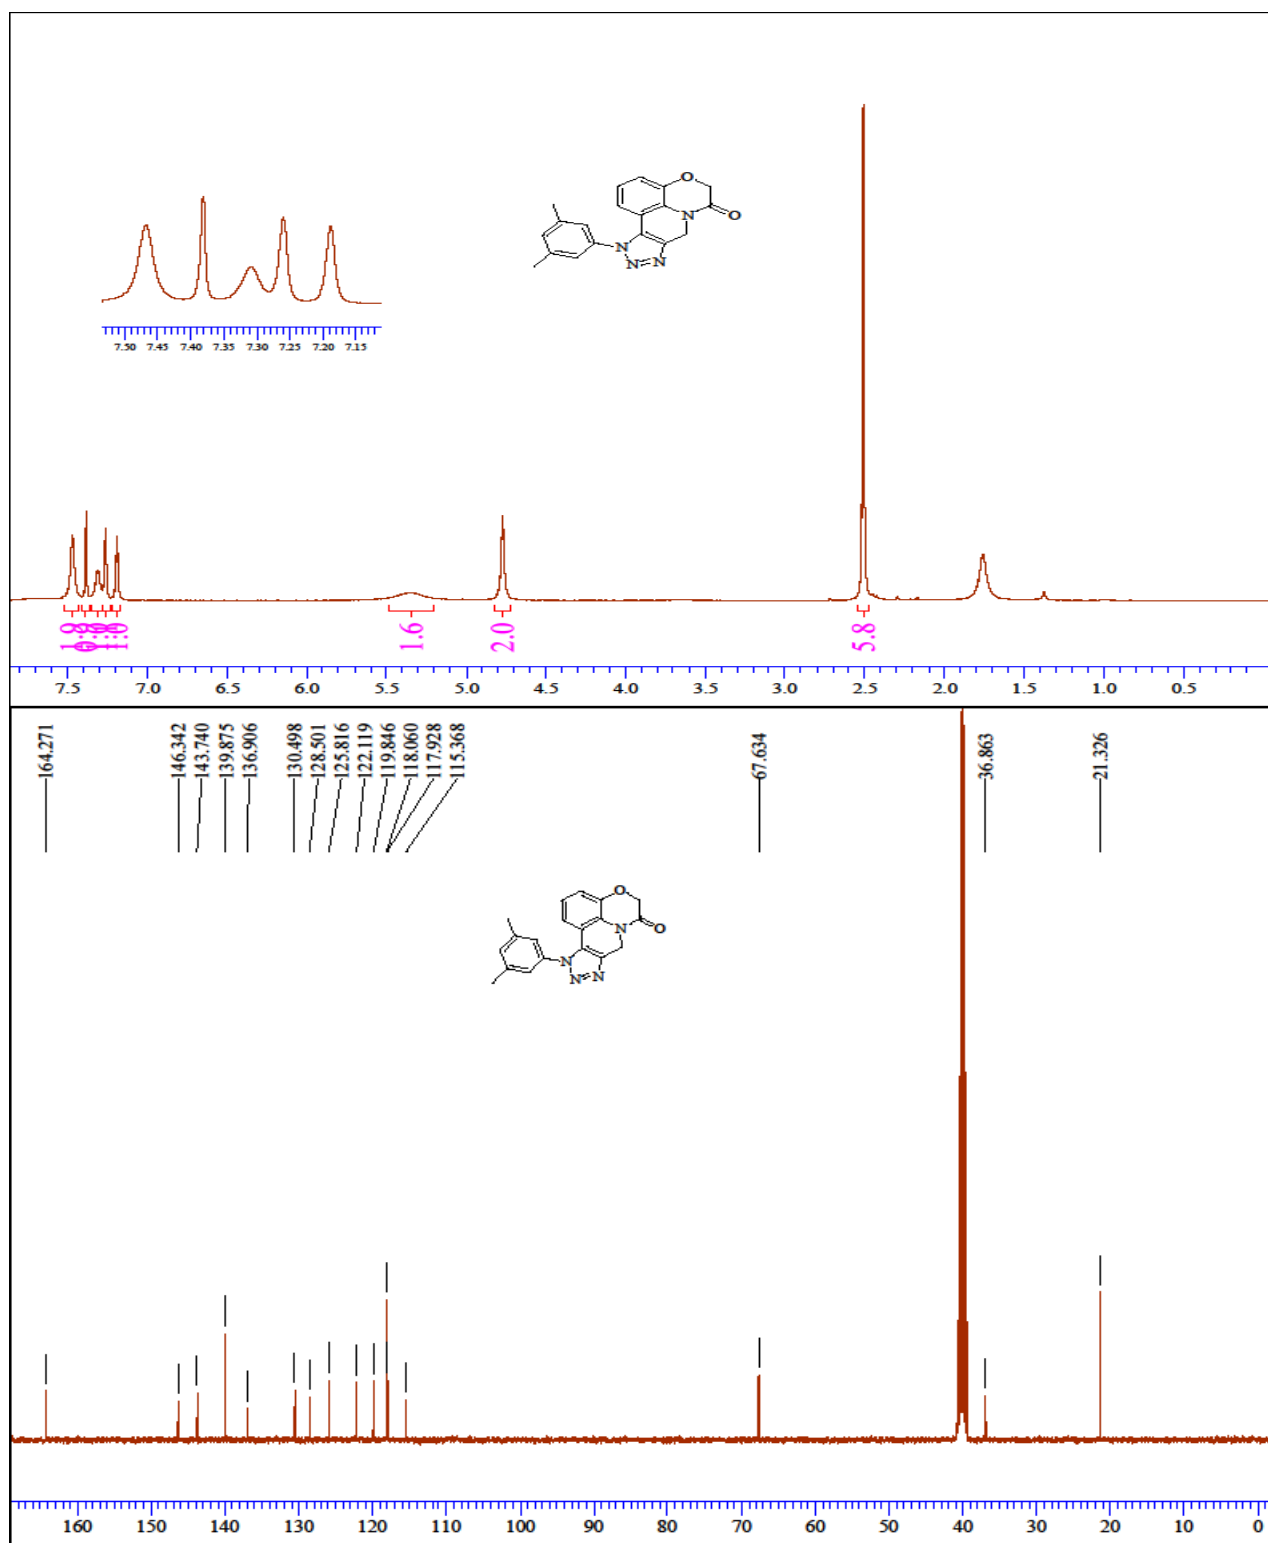

**11-(3,5-dichlorophenyl)-8,11-dihydro-[1,4]oxazino[2,3,4-ij][1,2,3]triazolo[4,5-c]quinolin-6(5H)-one(4c)**

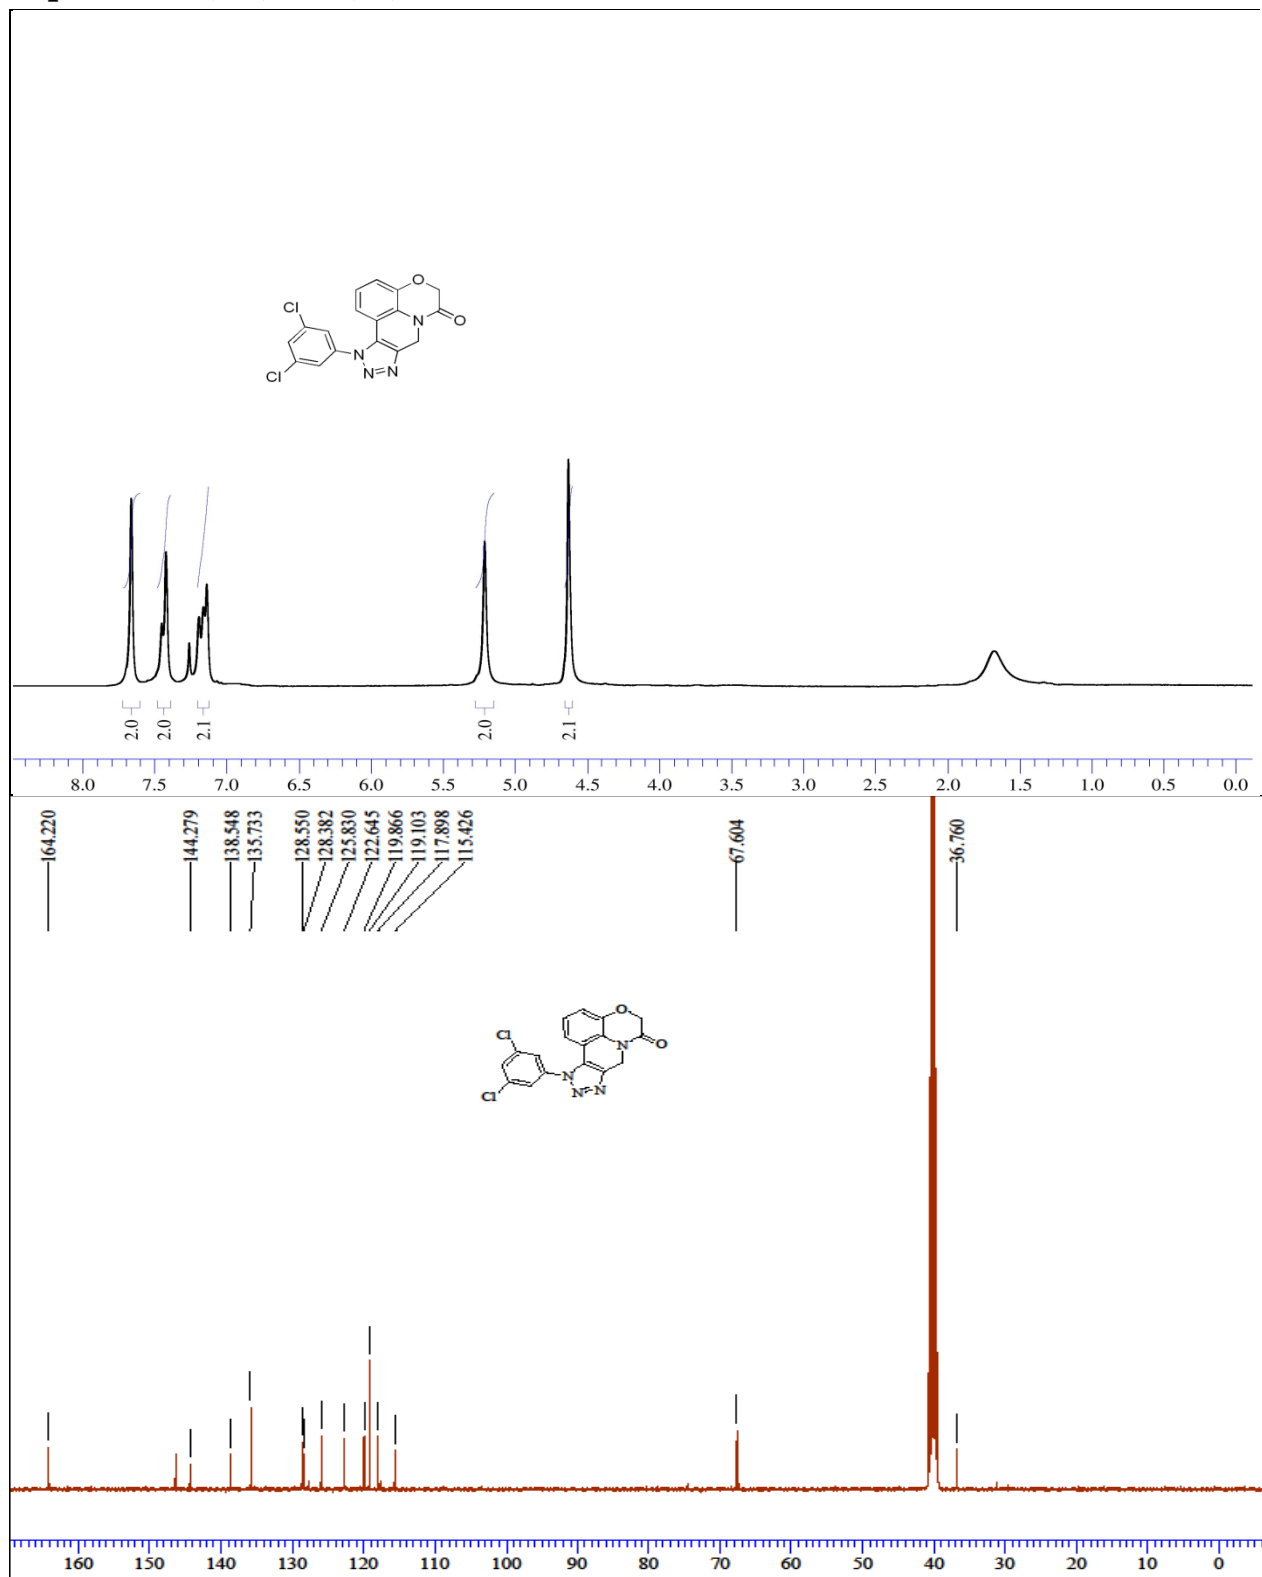

**11-(4-chloro-3,5-dimethoxyphenyl)-8,11-dihydro-[1,4]oxazino[2,3,4-ij][1,2,3]triazolo[4,5-c]quinolin-6(5H)-one (4d)**

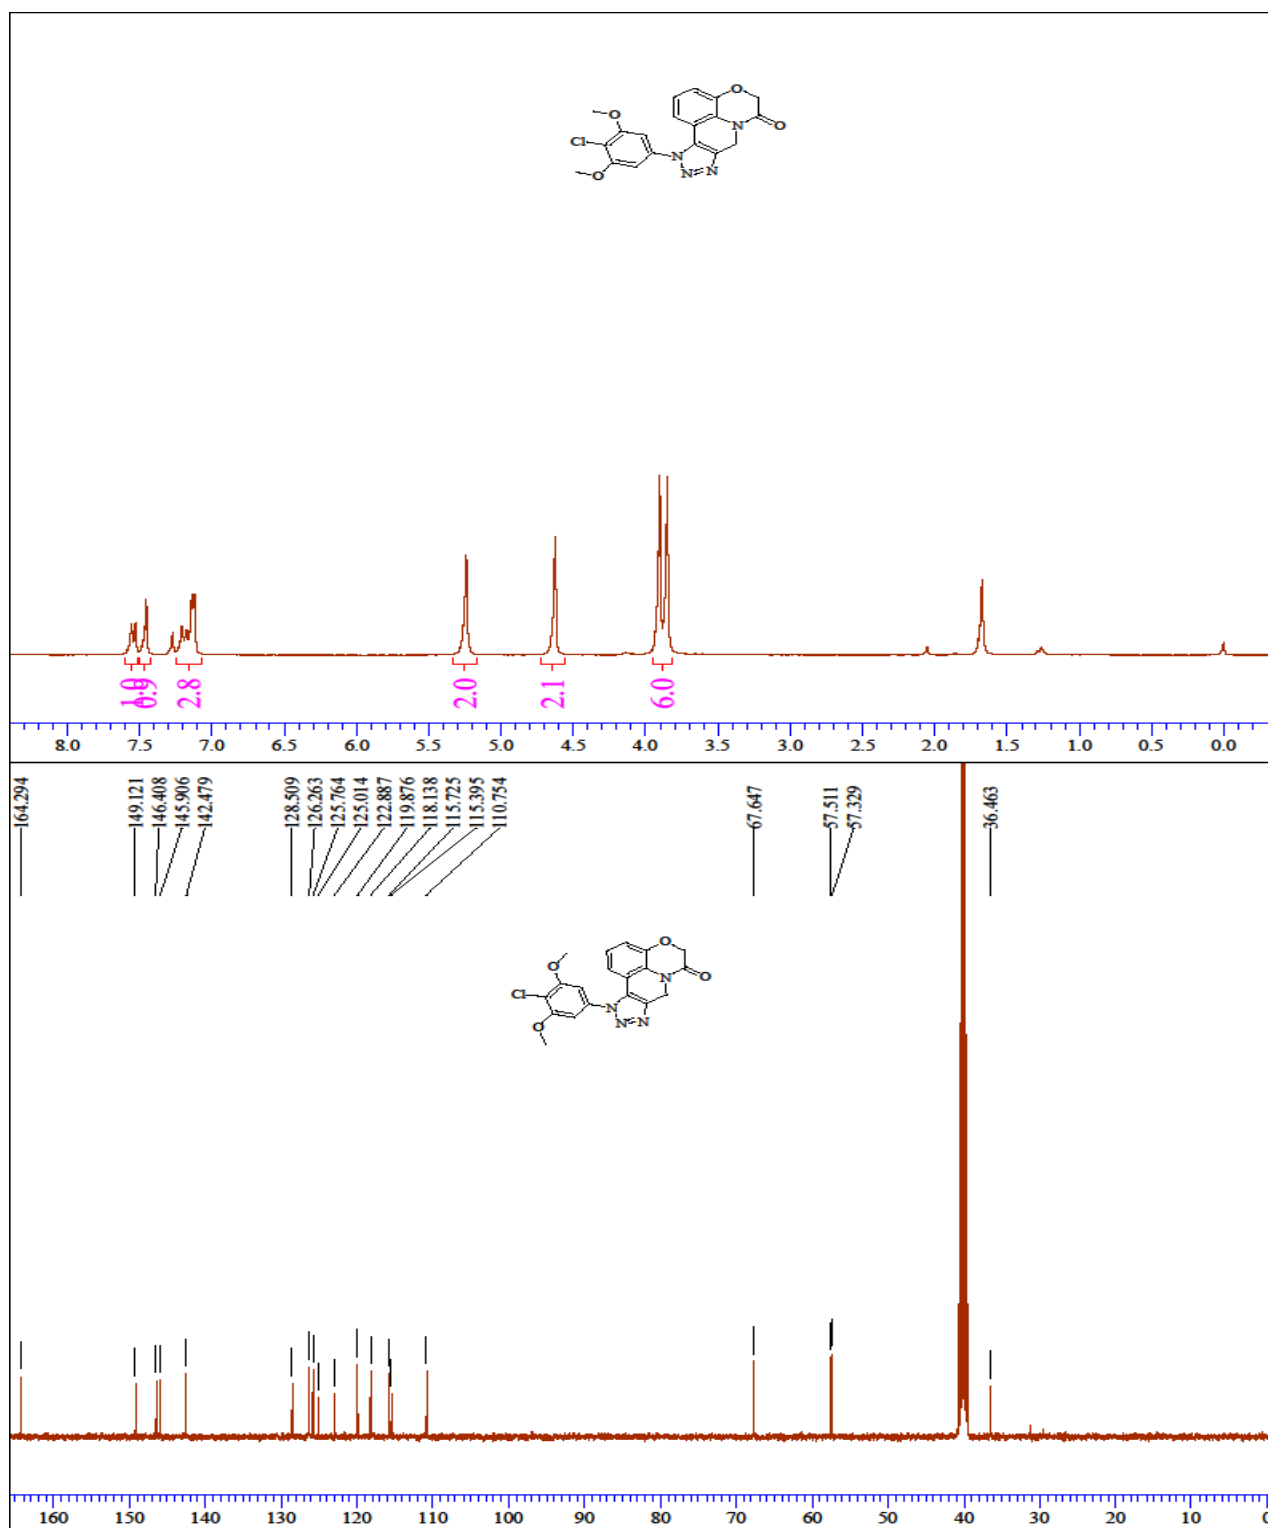

**11-(3-(trifluoromethyl)phenyl)-8,11-dihydro-[1,4]oxazino[2,3,4-ij][1,2,3]triazolo[4,5-c]quinolin-6(5H)-one (4e)**

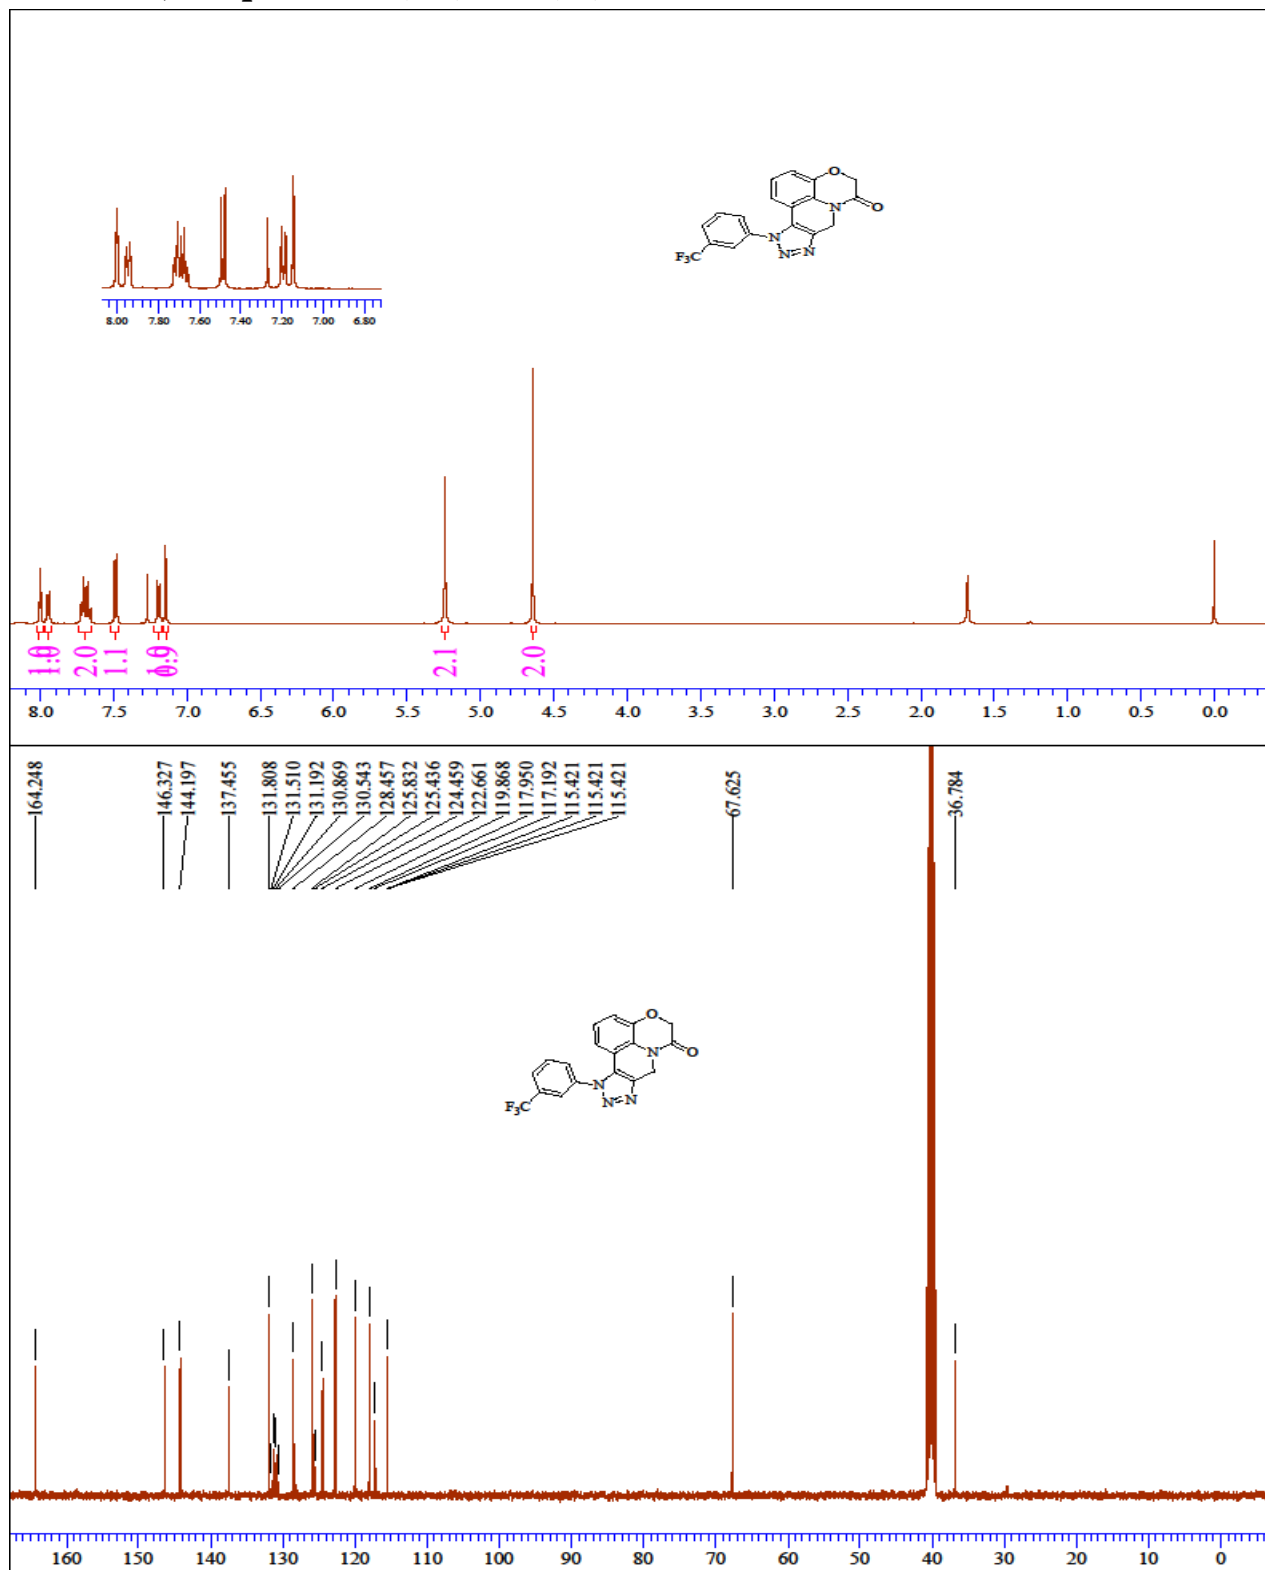

**11-(3-chlorophenyl)-8,11-dihydro-[1,4]oxazino[2,3,4-ij][1,2,3]triazolo[4,5-c]quinolin-6(5H)-one (4f)**

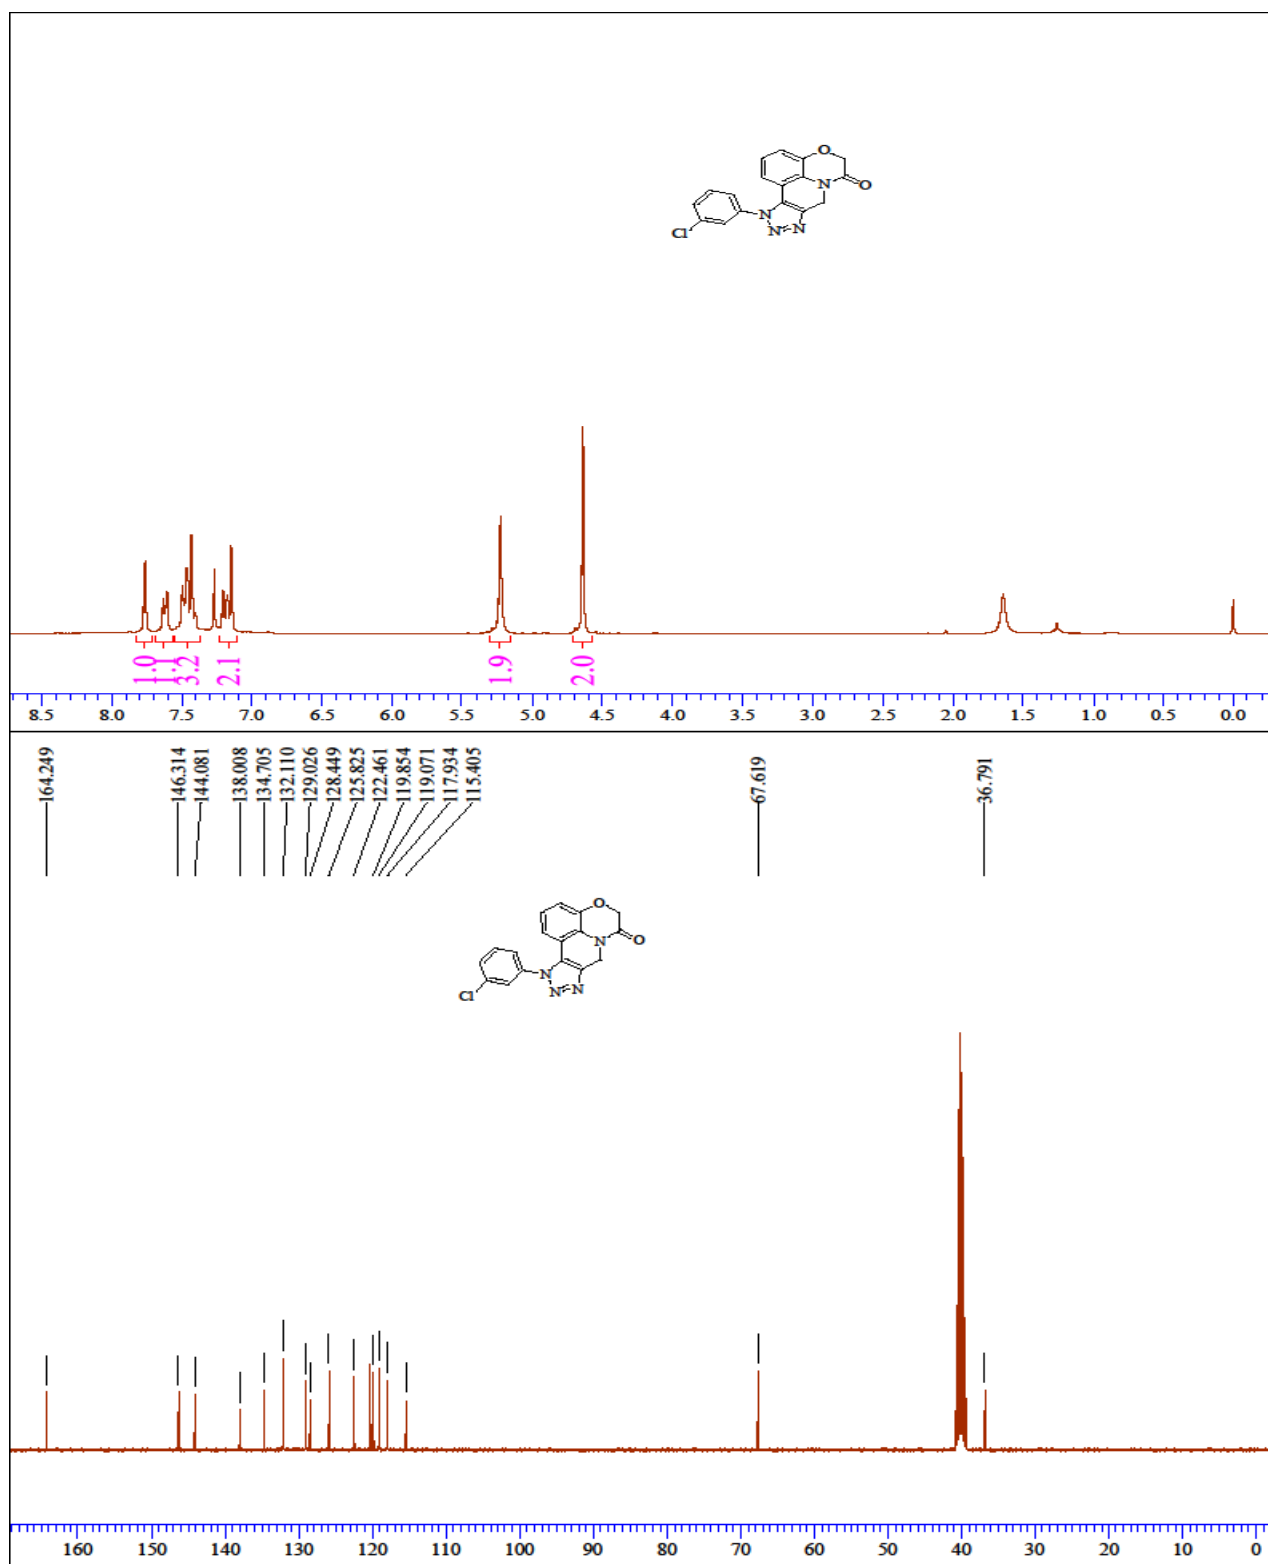



**11-(3-nitrophenyl)-8,11-dihydro-[1,4]oxazino[2,3,4-ij][1,2,3]triazolo[4,5-c]quinolin-6(5H)-one (4g)**

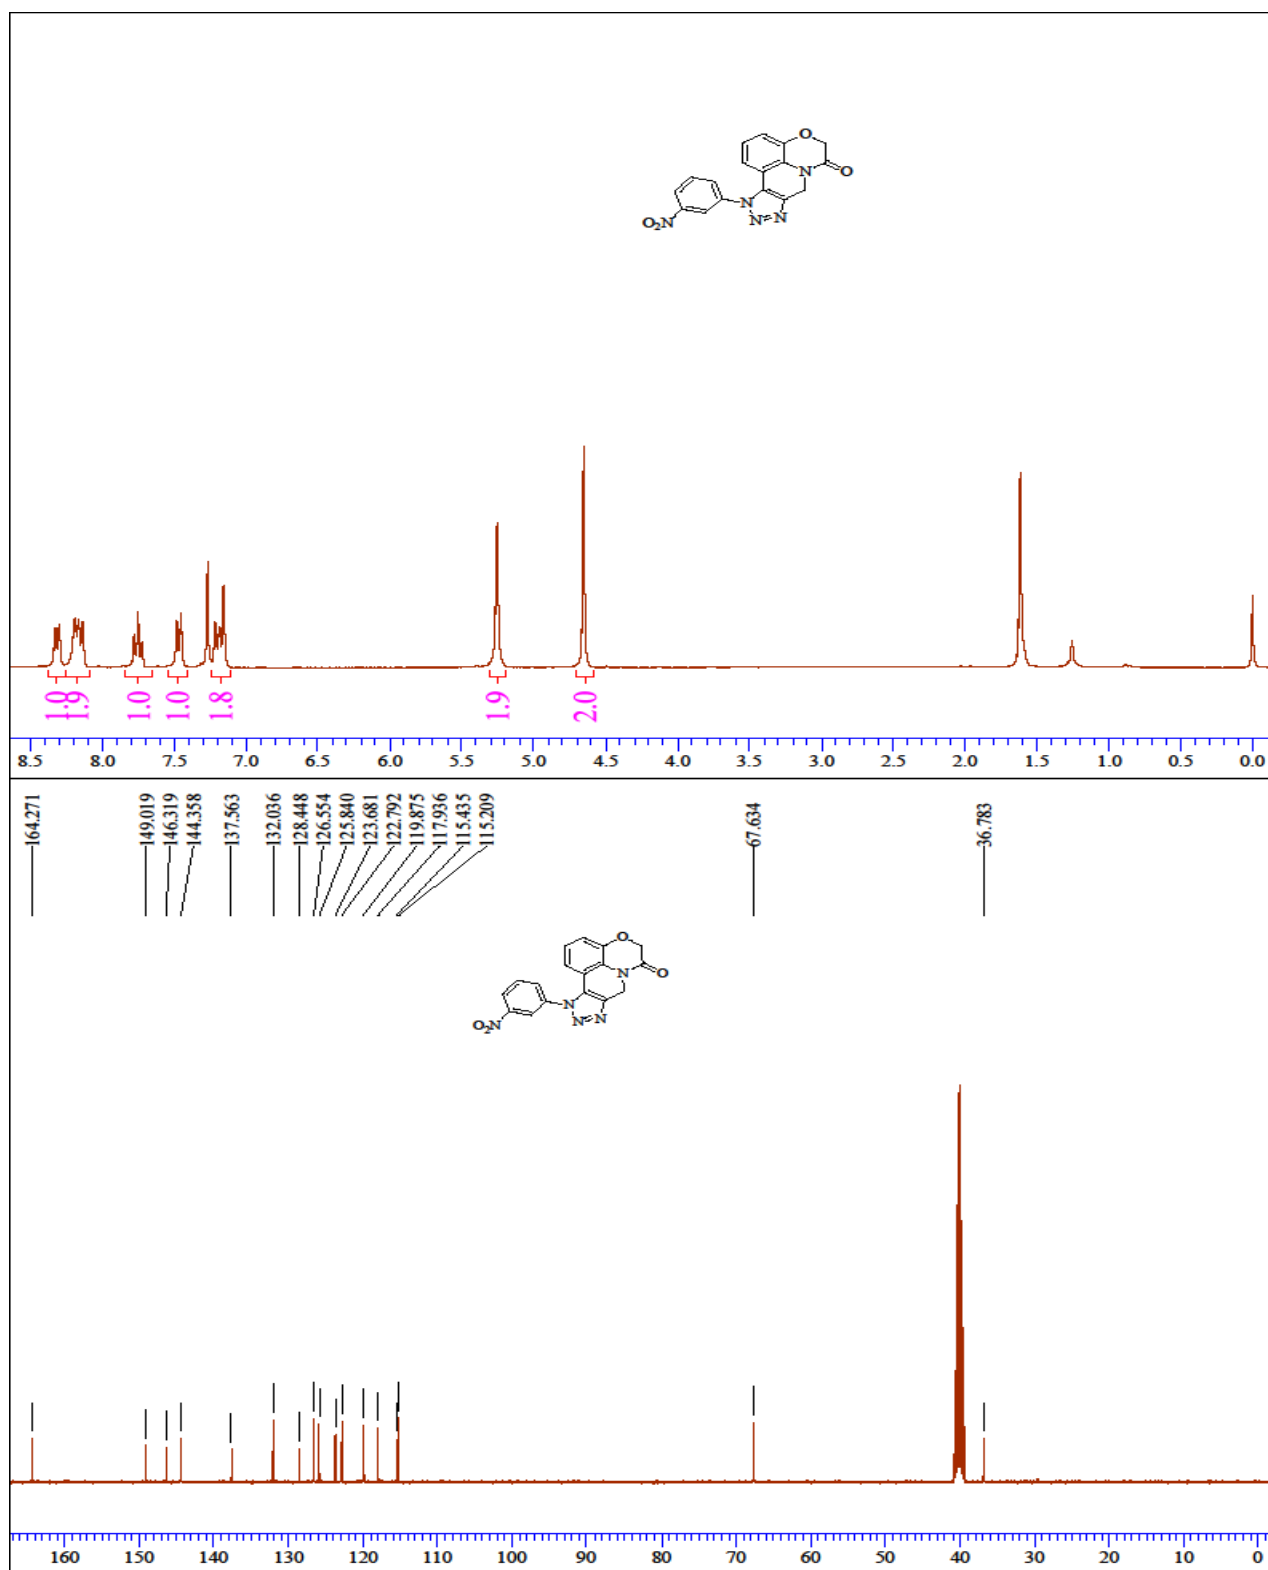

**11-(4-butylphenyl)-8,11-dihydro-[1,4]oxazino[2,3,4-ij][1,2,3]triazolo[4,5-c]quinolin-6(5H)-one(4h)**

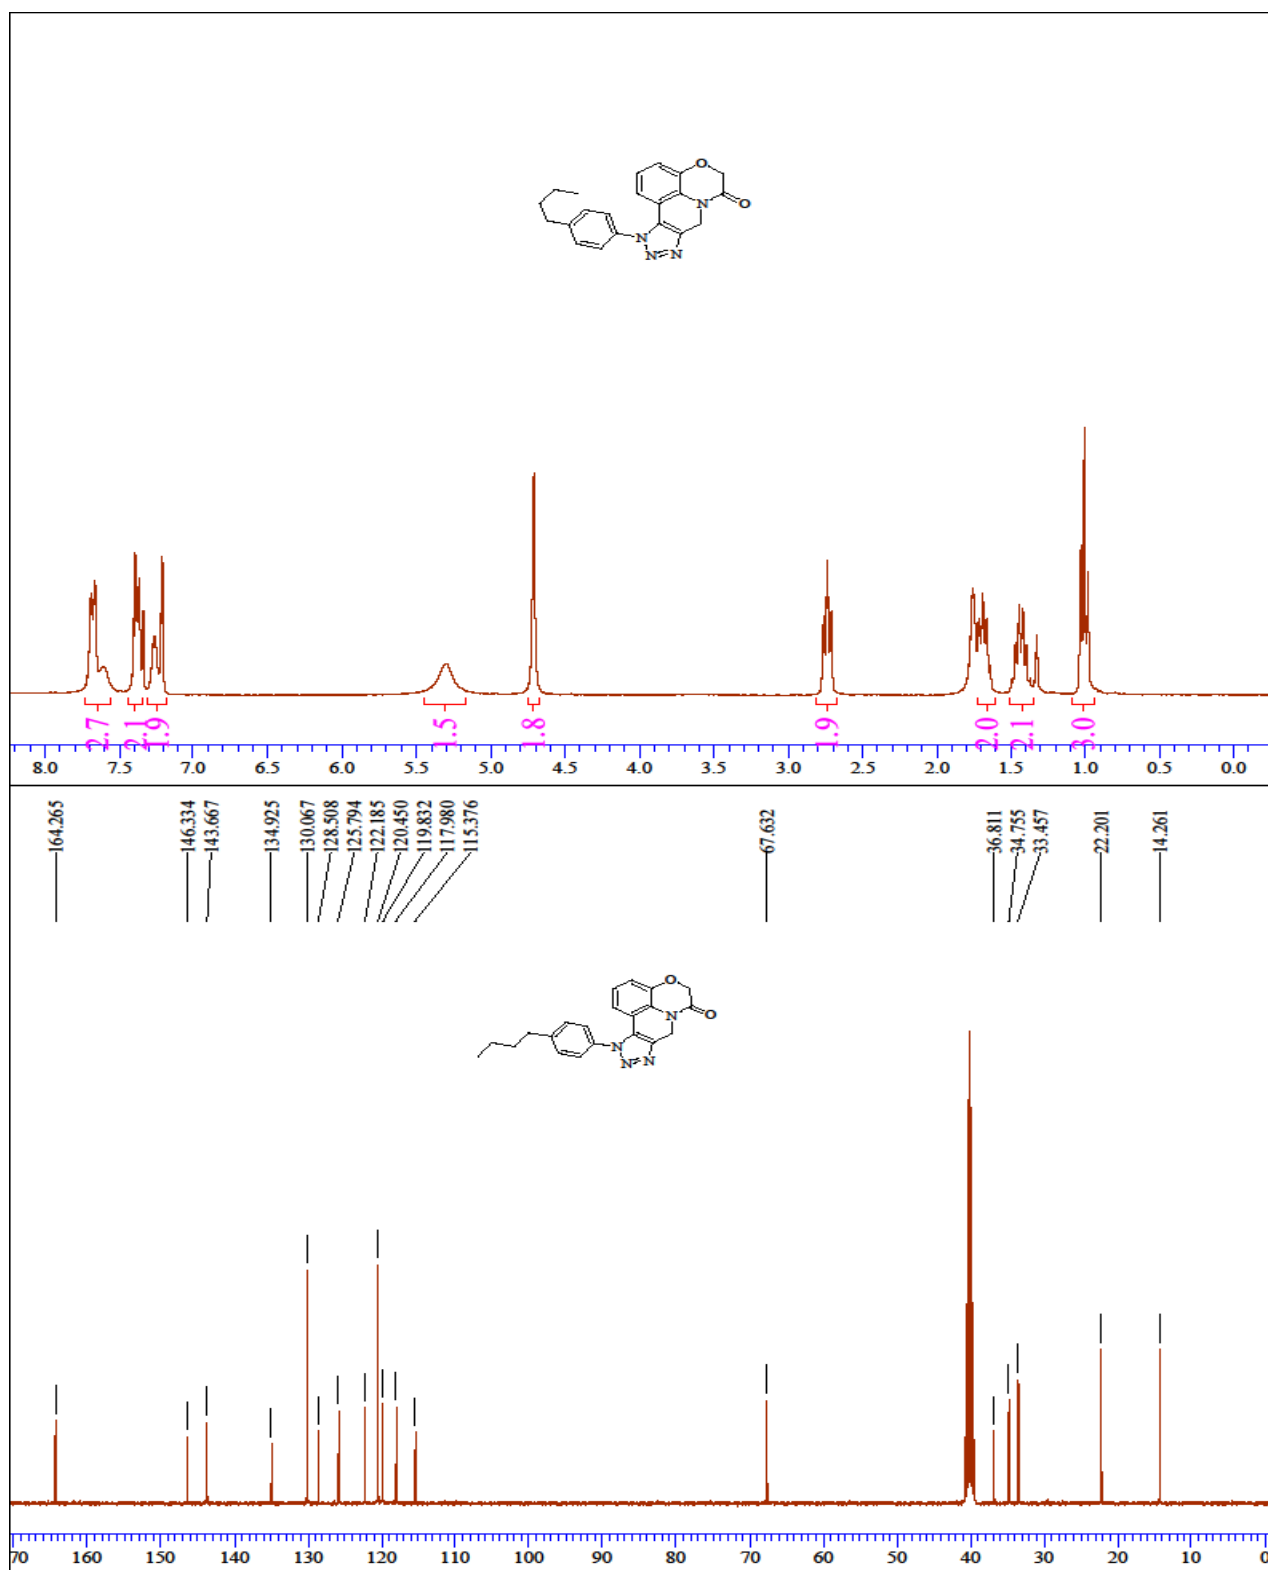

**11-(naphthalen-1-yl)-8,11-dihydro-[1,4]oxazino[2,3,4-ij][1,2,3]triazolo[4,5-c]quinolin-6(5H)-one (4i)**

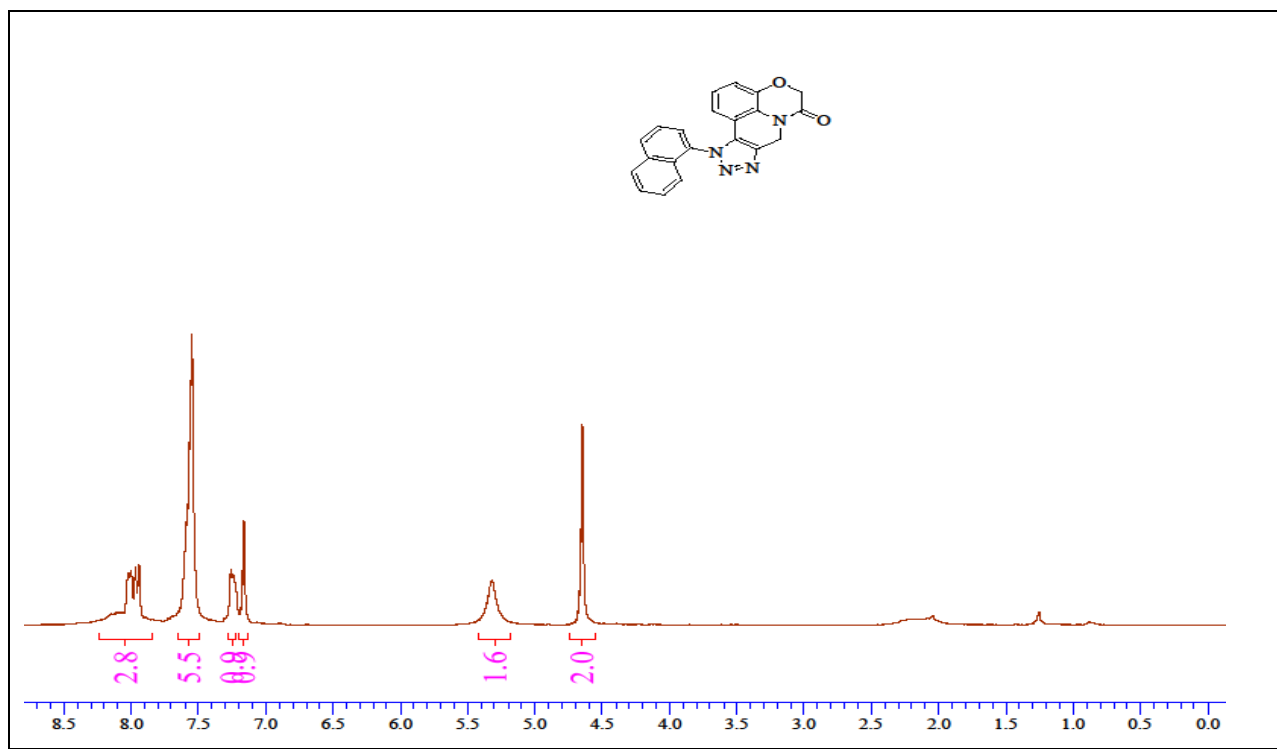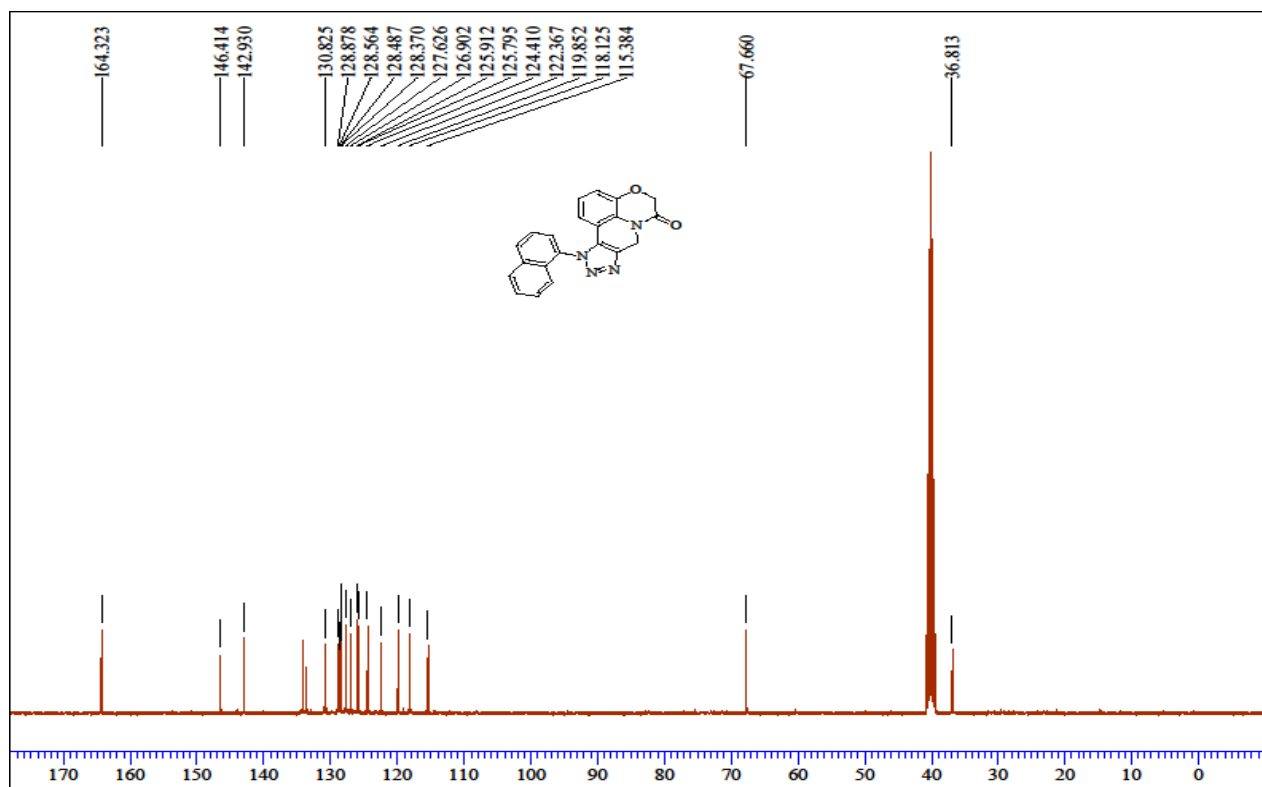

**11-(4-chlorophenyl)-8,11-dihydro-[1,4]oxazino[2,3,4-ij][1,2,3]triazolo[4,5-c]quinolin-6(5H)-one (4j)**

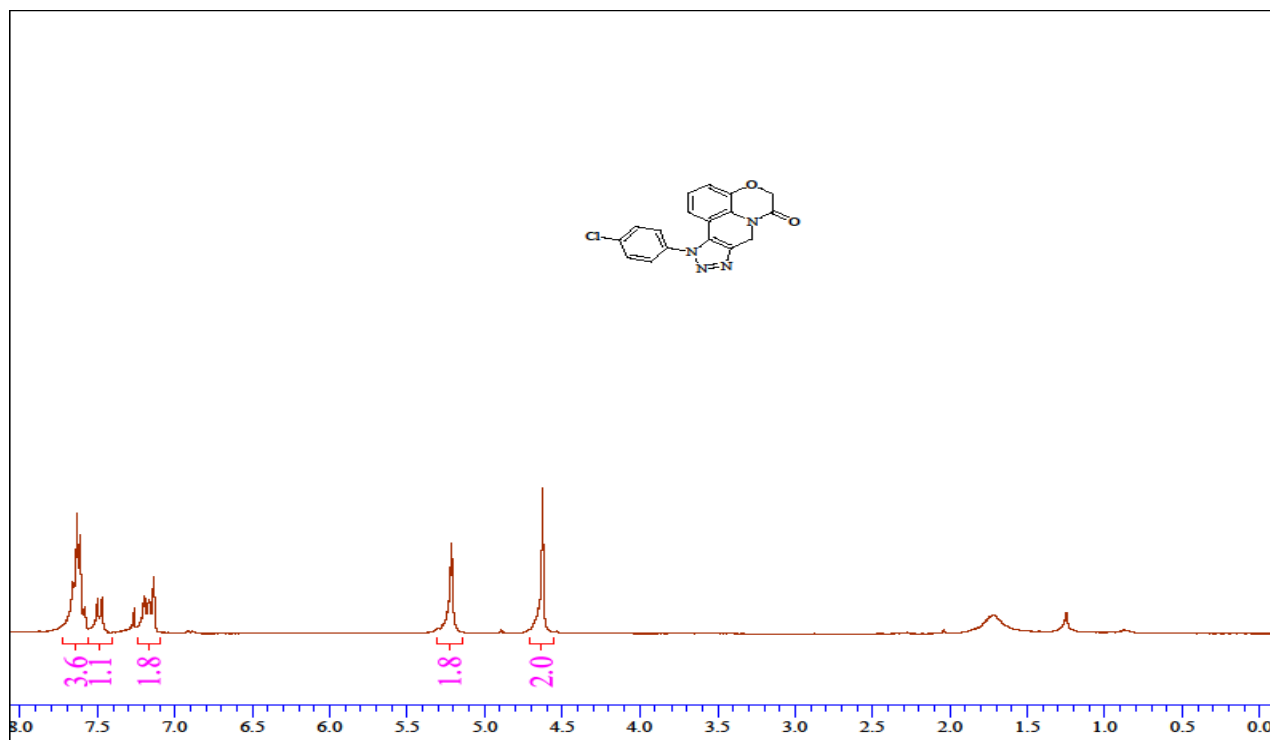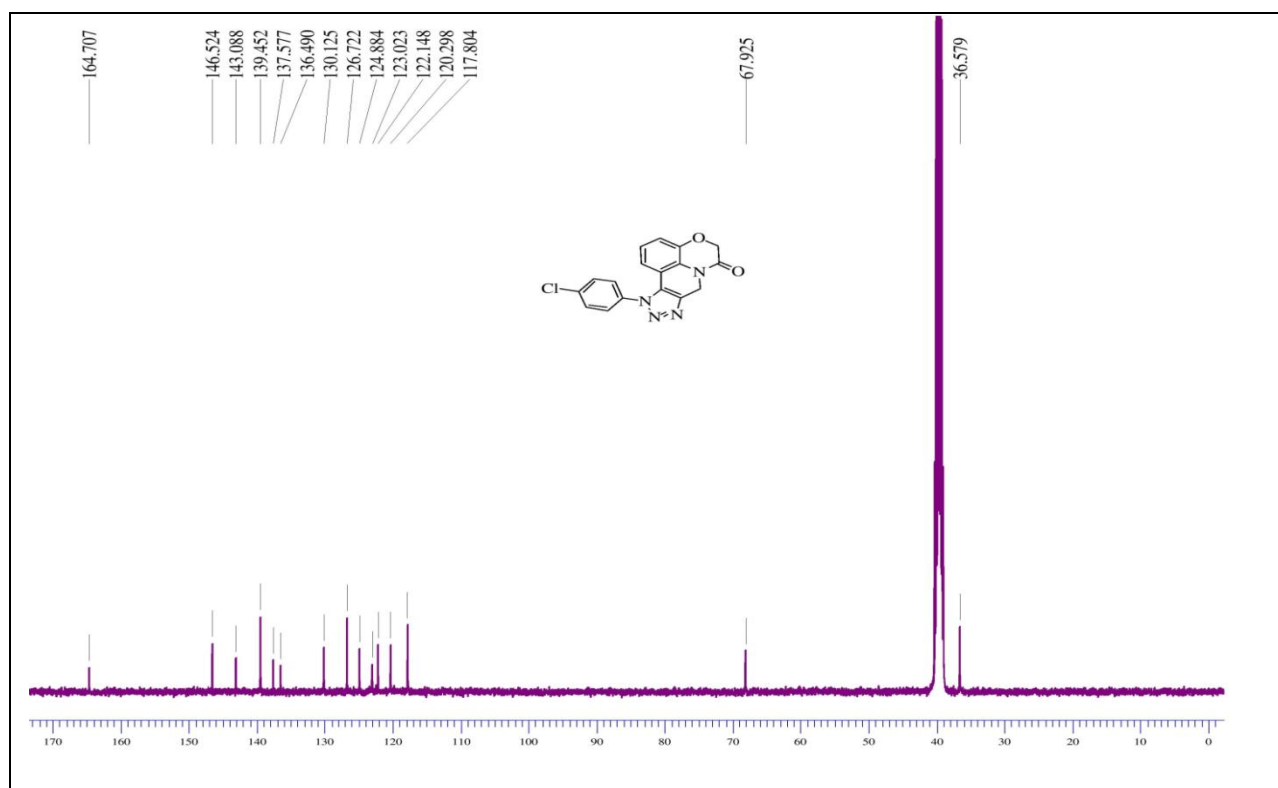

**11-(2-fluorophenyl)-8,11-dihydro-[1,4]oxazino[2,3,4-ij][1,2,3]triazolo[4,5-c]quinolin-6(5H)-one(4k)**

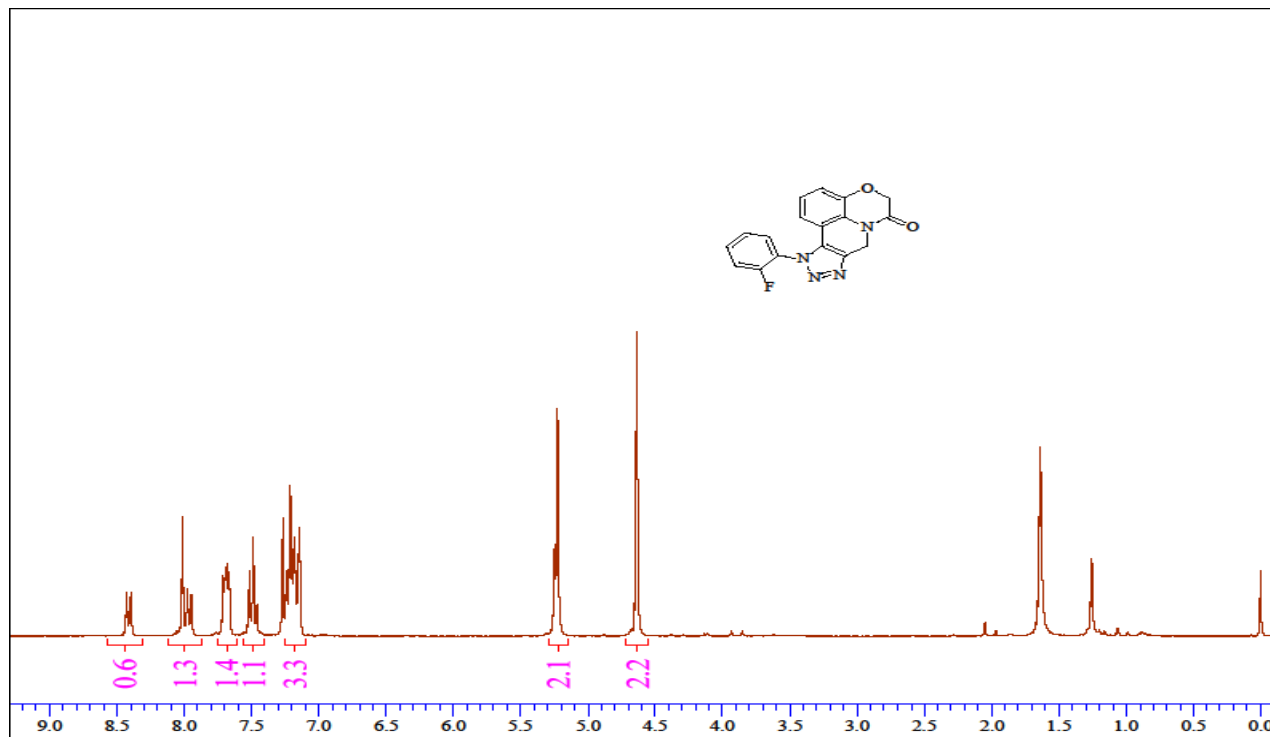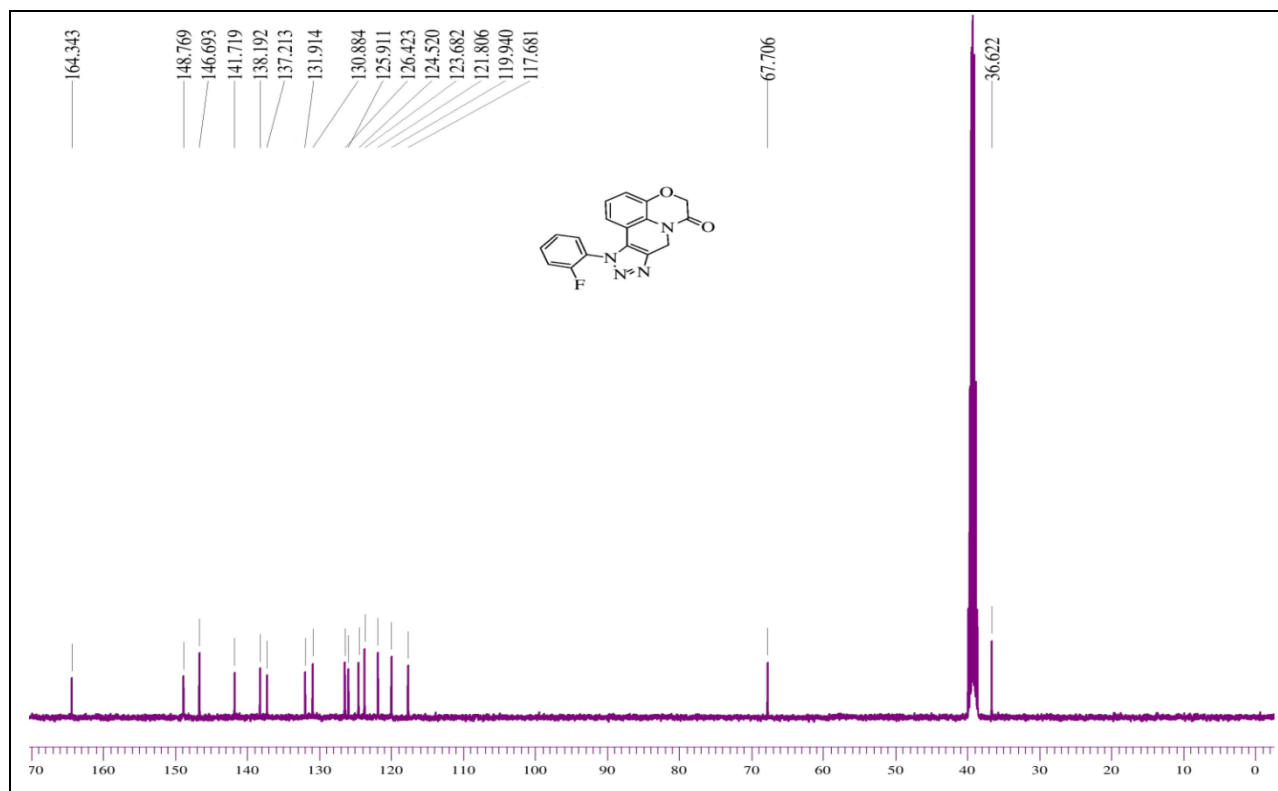

Supplement: c6ra12285j1.pdf [file c6ra12285j1.pdf]
